# Supplementary material
Source: PubMed Central journal article supplement (PMC3483789)

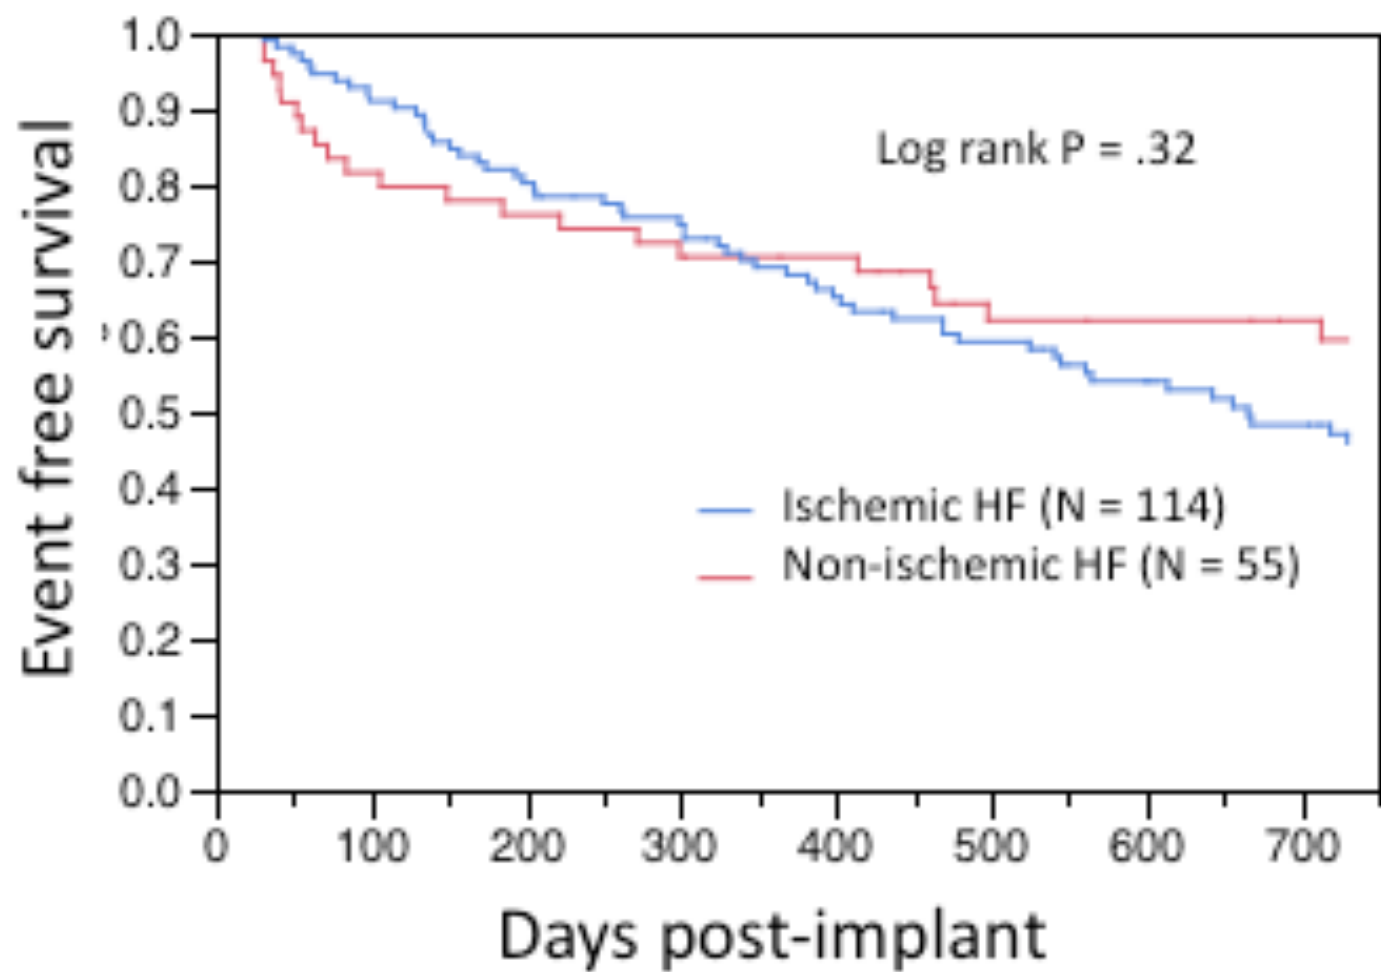

Supplement: NIHMS412187-supplement-suppl_fig_2.pdf [file NIHMS412187-supplement-suppl_fig_2.pdf]

# Cox proportional hazards regression

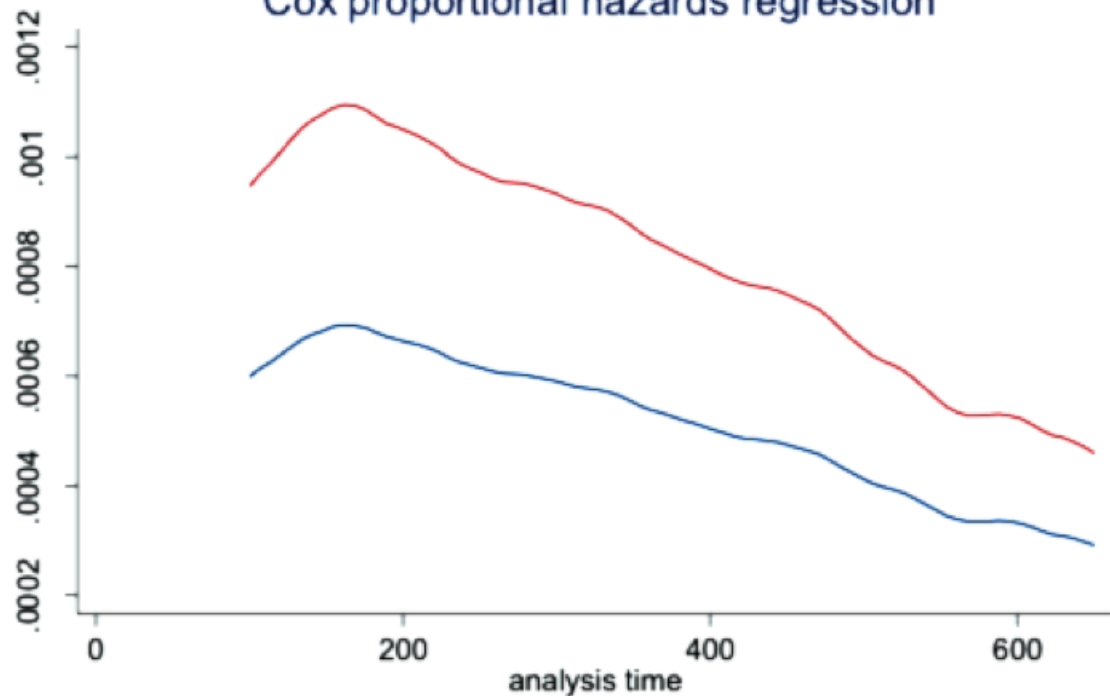

— Non-DM

— DM

Supplement: NIHMS412187-supplement-supple_fig_1.pdf [file NIHMS412187-supplement-supple_fig_1.pdf]
